CORRECTION

# Correction: Bayesian Sensitivity Analysis of a Cardiac Cell Model Using a Gaussian Process Emulator

Eugene T. Y. Chang, Mark Strong, Richard H. Clayton

There are multiple errors in [S1 Text](#). Please view the correct [S1 Text](#) below.

## Supporting Information

**S1 Text. Additional mathematical details.** Detailed description of the Gaussian process emulator, how the design data were used to fit the emulator, how the emulator was evaluated, and how it was used for variance based sensitivity analysis. (PDF)

## Reference

1. Chang ETY, Strong M, Clayton RH (2015) Bayesian Sensitivity Analysis of a Cardiac Cell Model Using a Gaussian Process Emulator. PLoS ONE 10(6): e0130252. doi:[10.1371/journal.pone.0130252](https://doi.org/10.1371/journal.pone.0130252) PMID: [26114610](https://pubmed.ncbi.nlm.nih.gov/26114610/)

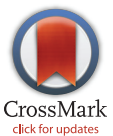

## OPEN ACCESS

**Citation:** Chang ETY, Strong M, Clayton RH (2015) Correction: Bayesian Sensitivity Analysis of a Cardiac Cell Model Using a Gaussian Process Emulator. PLoS ONE 10(8): e0137004. doi:[10.1371/journal.pone.0137004](https://doi.org/10.1371/journal.pone.0137004)

**Published:** August 27, 2015

**Copyright:** © 2015 Chang et al. This is an open access article distributed under the terms of the [Creative Commons Attribution License](https://creativecommons.org/licenses/by/4.0/), which permits unrestricted use, distribution, and reproduction in any medium, provided the original author and source are credited.
